# Supplementary material
Source: bioRxiv or medRxiv preprint supplement (https://www.biorxiv.org/highwire/filestream/121438/field_highwire_adjunct_files/0/401372-1.pdf)

Supplemental Figure 1)

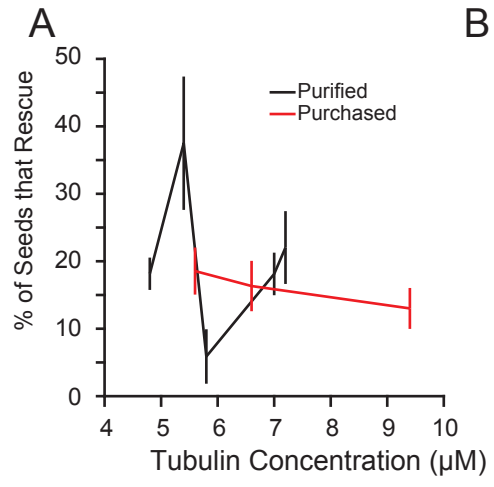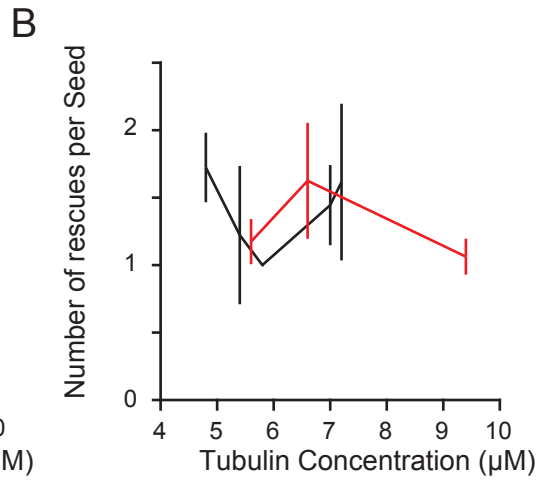

Supplement: Supplementary file [file 401372-1.pdf]
